# Supplementary material
Source: publisher figshare collection journal article supplement (https://tandf.figshare.com/articles/dataset/_/7590866)
Supplement: Supplementary file 1 [file 2]

Archive with 2 entries (2 files):
- CCT-software.zip
- CCT-supplement.pdf
